# Supplementary material for: A two-photon lysosome-targeted probe for endogenous formaldehyde in living cells
Source: Royal Society of Chemistry journal article supplement (doi:10.1039/d2ra02672d), 2022-01-01
Supplement: d2ra02672d1.pdf [file d2ra02672d1.pdf]

## **A two-photon lysosome-targeted probe for endogenous formaldehyde in living cells**

Ting Cao <sup>a1</sup>, Hong Ma <sup>b</sup>

<sup>a</sup> Key Laboratory of Magnetic Molecules & Magnetic Information Materials  
Ministry of Education, The School of Chemical and Material Science, Shanxi  
Normal University, Taiyuan 030031, P. R. China

<sup>b</sup> Department of Chemistry, Taiyuan Normal University, Jinzhong 030619, P. R.  
China

---

<sup>1</sup> Corresponding author: Fax: +86-931-8912582 E-mail address: [caoting@sxnu.edu.cn](mailto:caoting@sxnu.edu.cn)

## TABLE OF CONTENTS

1. Spectroscopic/photophysical data of *AMNT* in addition of FA. (Table S1)
2. Photophysical Properties of *AMNT* in the absence and in addition of FA. (Table S2)
3. Time course fluorescence spectra of *AMNT* with different equiv of FA. (Figure S1)
4. Linear calibration curve of fluorescence intensity of *AMNT* with FA. (Figure S2)
5. Emission response of *AMNT* upon addition of 100 equiv of FA and other analyte. (Figure S3)
6. Fluorescence intensity of *AMNT* in the absence and presence of FA as a function of pH. (Figure S4)
7. Light stability of *AMNT*. (Figure S5)
8. Fluorescence spectra of the free probe *AMNT*, *AMNT* treated with FA, and *AMNT* after treated with NaHSO<sub>3</sub>. (Figure S6)
9. Reaction-time profiles of the probe treated with FA, free probe, or FA pre-incubated with NaHSO<sub>3</sub> then treated with the probe. (Figure S7)
10. The fluorescence integral area and two-photon absorption cross-section spectrum of *AMNT* and *AMNT-FA*. (Figure S8)
11. Effects of *AMNT* at varied concentrations on the viability of HeLa cells. (Figure S9)
12. Global analyses of decay times  $\tau_1$ ,  $\tau_2$ , and the relative amplitude(%). (Figure S10)
13. NMR Spectrum spectra of *AMNT*. (Figure S11)
14. MS Spectrum spectra of *AMNT* and *AMNT-FA*. (Figure S12-13)

### 1. General information and methods

**Measurements of photophysical properties.** UV-vis absorption spectra were obtained on a Varian UV-Cary5000 spectrophotometer. In order to get the corrected steady-state excitation and emission spectra, a Hitachi F-7000 spectrofluorimeter was used. Fluorescence emission spectra were collected using Hitachi F-7000 spectrofluorimeter with 1 cm quartz cells. Fluorescein (in 0.1 N NaOH pH = 13,  $\Phi_f = 0.89$ ) were used as fluorescence standard for quantum yield test.[1]

**Time-resolved fluorescence spectroscopy.** Fluorescence lifetimes were detected by a FLS920. The monitored wavelength was 540 nm. Fluorescence decay histograms

were recorded using the time-correlated single photon counting technique in 4096 channels through a FLS920 spectrometer equipped with a supercontinuum white laser (400-700 nm). Histograms of the instrument response functions (using LUDOX scatterer) and sample decays were obtained until it typically reached  $1.0 \times 10^4$  counts. The fitting parameters (decay times and pre-exponential factors) were decided by minimizing the reduced chi-square  $\chi^2$ .

**Cell culture, fluorescence imaging.** To obtain the cell permeability of *AMNT*, HeLa cells were cultured in DMEM (Dulbecco's Modified Eagle Medium) subjoined with 10% FBS (fetal bovine serum). The cell lines were kept in a moist atmosphere containing 5% CO<sub>2</sub> at 37 °C. Cells were incubated with *AMNT* (10  $\mu$ M) in 1.0 mL of fresh culture medium for 0.5 h after removal of the culture medium. Cells were incubated and rinsed with phosphate-buffered saline (PBS) three times to remove free compound before imaging.

| Imaging method | $C_{AMNT}$ | $C_{FA}$            | Cell type | Imaging instrument     | Excitation wavelength | Emission wavelength |
|----------------|------------|---------------------|-----------|------------------------|-----------------------|---------------------|
| Single-photon  | 10 $\mu$ M | 300/<br>500 $\mu$ M | HeLa      | Olympus<br>FV1000-IX81 | 458 nm                | 510-580 nm          |
| Two-photon     | 10 $\mu$ M | 300/<br>500 $\mu$ M | HeLa      | Olympus<br>FV1000 MPE  | 810 nm                | 510-550 nm          |

**Cytotoxicity tests.** The cytotoxic activity experiment of complex against HeLa cells was tested according to standard 3-(4,5-diethylthiazol-2-yl)-5-(3-carboxymethoxyphenyl)-2-(4-sulfophenyl)-2H-tetrazolium, inner salt (MTS) assay procedures. HeLa cells were seeded in 96-well assay plates at a density of  $10^4$  cells per well (100  $\mu$ L total volume/well) for 24 h. The as-prepared *AMNT* (10  $\mu$ M,) were added in the serum-free medium and incubated with the cells for 24 h after that. The control experiment was finished by detecting the growth culture medium without *AMNT*. The optical absorbance of the cells was detected at 528 nm through a microplate reader (German Berthold Mithras2LB943).

**The limit of detection calculation.** The detection limit (DL) for FA was calculated

by the linear function in Figure S2 and the following equation:

$$DL = 3.3\sigma / k$$

Where  $\sigma$  is the standard derivation of fluorescence intensity of ( $I_{528\text{ nm}}$ ) *AMNT* blank solutions;  $k$  is the slope of the linear calibration curve in Figure S2; the concentration of *AMNT* is 10  $\mu\text{M}$ .

**Table S1.** Spectroscopic data of *AMNT* (10  $\mu\text{M}$ ) in the absence and addition of FA.

| Compounds                                                                                                        | Reaction time                                                                                                                                                                                                                                                                                                                                                                    | $\lambda_{\text{abs}} / \text{nm}$ | $\lambda_{\text{ems}} / \text{nm}$ | $\Phi_f$ |
|------------------------------------------------------------------------------------------------------------------|----------------------------------------------------------------------------------------------------------------------------------------------------------------------------------------------------------------------------------------------------------------------------------------------------------------------------------------------------------------------------------|------------------------------------|------------------------------------|----------|
| <b><i>AMNT</i></b>                                                                                               | -                                                                                                                                                                                                                                                                                                                                                                                | 435                                | 540                                | 0.115    |
| <b><i>AMNT</i>+ 100 equiv. FA</b>                                                                                | 30 min                                                                                                                                                                                                                                                                                                                                                                           | 435                                | 528                                | 0.217    |
| 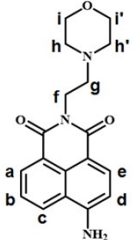 <p><b><i>AMNT</i></b></p>     | $^1\text{H NMR}$ ( $\text{CDCl}_3$ ) Spectrum of <b><i>AMNT</i></b> : $\delta$ 8.46 (d, 1H, $J = 8.0$ Hz, H-a), 8.25 (d, 1H, $J = 8.0$ Hz, H-c), 8.00 (d, 1H, $J = 8.0$ Hz, H-e ), 7.53 (t, 1H, $J = 8.0$ Hz, H-b), 7.73 (d, 1H, $J = 8.0$ Hz, H-d), 4.28 (t, 2H, $J = 8.0$ Hz, H-f), 3.67 (t, 4H, $J = 4.0$ Hz, H-i+i'), 2.74 (t, 2H, $J = 8.0$ Hz, H-g), 2.67 (m, 4H, H-h+h'). |                                    |                                    |          |
|  <p><b><i>AMNT</i></b></p>    | $\text{MS}$ Spectrum of <b><i>AMNT</i></b> (( $\text{C}_{18}\text{H}_{19}\text{N}_3\text{O}_3$ ): the exact molecular weight calcd for <b><i>AMNT</i></b> is 325.14, found is 326.19 (M+1).                                                                                                                                                                                      |                                    |                                    |          |
|  <p><b><i>AMNT+FA</i></b></p> | $\text{MS}$ Spectrum of <b><i>AMNT+FA</i></b> (( $\text{C}_{19}\text{H}_{19}\text{N}_3\text{O}_3$ ): the exact molecular weight calcd for <b><i>AMNT+FA</i></b> is 337.14, found is 338.36 (M+1).                                                                                                                                                                                |                                    |                                    |          |

**Table S2.** Photophysical Properties of *AMNT* (10  $\mu\text{M}$ ) in the absence and in addition of FA at the same excitation wavelength (435 nm), but at different emission wavelength. Global analyses of decay times  $\tau_i$  (ns), and the relative amplitude  $\alpha_i$  (%), each datum was recorded 0.5 h after FA addition.

| Addition of HCHO / $\mu\text{M}$ | Monitored Wavelength / nm | $\tau_1$ (ns)     | $\tau_2$ (ns)      | $\alpha_1$ (%) | $\alpha_2$ (%) | $\chi^2$ |
|----------------------------------|---------------------------|-------------------|--------------------|----------------|----------------|----------|
| 0                                | 530                       | 4.13 $\pm$ 0.0004 | 10.33 $\pm$ 0.0025 | 95.5           | 4.5            | 1.04     |
|                                  | 540                       |                   |                    | 95.4           | 4.6            | 1.06     |
|                                  | 550                       |                   |                    | 95.7           | 4.3            | 1.12     |
| 100                              | 520                       | 4.63 $\pm$ 0.0010 | 7.70 $\pm$ 0.0005  | 58.4           | 41.6           | 1.07     |
|                                  | 530                       |                   |                    | 54.2           | 45.8           | 1.02     |
|                                  | 540                       |                   |                    | 56.6           | 43.4           | 1.00     |
| 500                              | 520                       | 4.65 $\pm$ 0.0018 | 7.54 $\pm$ 0.0007  | 37.1           | 62.9           | 1.03     |
|                                  | 530                       |                   |                    | 40.2           | 59.8           | 1.04     |
|                                  | 540                       |                   |                    | 43.1           | 56.9           | 1.04     |
| 1000                             | 520                       | 4.73 $\pm$ 0.0026 | 7.48 $\pm$ 0.0007  | 29.7           | 70.3           | 1.05     |
|                                  | 530                       |                   |                    | 32.7           | 67.3           | 1.04     |
|                                  | 540                       |                   |                    | 34.2           | 65.8           | 1.02     |

**Table S3.** Comparison of the proposed method with other methods for FA detection.

| Linear range         | Organelle-targeted ability | Detection Limit    | Excitation and Emission                                              | React time | Reference                                 |
|----------------------|----------------------------|--------------------|----------------------------------------------------------------------|------------|-------------------------------------------|
| 0-100 $\mu\text{M}$  | no                         | 5 $\mu\text{M}$    | $\lambda_{\text{ex}}$ = 645 nm<br>$\lambda_{\text{em}}$ = 662 nm     | 120 min    | J. Am. Chem. Soc. 2015, 137, 10886-10889  |
| 0-5000 $\mu\text{M}$ | no                         | 10 $\mu\text{M}$   | $\lambda_{\text{ex}}$ = 633 nm<br>$\lambda_{\text{em}}$ = 649 nm     | 180 min    | J. Am. Chem. Soc. 2015, 137,10890-10893   |
| 0-200 $\mu\text{M}$  | no                         | 0.71 $\mu\text{M}$ | $\lambda_{\text{ex}}$ = 440 nm<br>$\lambda_{\text{em}}$ = 543 nm     | 30 min     | Angew. Chem. Int. Ed. 2016, 55, 3356-3359 |
| 0-3000 $\mu\text{M}$ | no                         | 59.6 $\mu\text{M}$ | $\lambda_{\text{ex}}$ = 318 nm<br>$\lambda_{\text{em}}$ = 451/359 nm | 240 min    | Chem. Commun., 2016, 52, 4029-4032        |
| 0 -150 $\mu\text{M}$ | no                         | 0.57 $\mu\text{M}$ | $\lambda_{\text{ex}}$ = 365 nm<br>$\lambda_{\text{em}}$ = 513 nm     | 180 min    | Talanta, 2016, 160, 645-652               |
| 0–200 $\mu\text{M}$  | no                         | 0.5 $\mu\text{M}$  | $\lambda_{\text{ex}}$ =405 nm<br>$\lambda_{\text{em}}$ =570/495 nm   | 120 min    | Chem. Sci., 2017, 8, 5616-5621            |

|                                       |                               |                                      |                                                                                                                |               |                                                                                    |
|---------------------------------------|-------------------------------|--------------------------------------|----------------------------------------------------------------------------------------------------------------|---------------|------------------------------------------------------------------------------------|
| 0–500 $\mu\text{M}$                   | no                            | 5 $\mu\text{M}$                      | $\lambda_{\text{ex}} = 440$<br>$\lambda_{\text{em}} = 510 \text{ nm}$                                          | 240 min       | Sens. Actuators, B,<br>2017, 241, 1050-<br>1056                                    |
| 2.0-10.0<br>$\mu\text{M}$             | no                            | 0.77 $\mu\text{M}$                   | $\lambda_{\text{ex}} = 530 \text{ nm}$<br>$\lambda_{\text{em}} = 560 \text{ nm}$                               | 2 min         | Chem. Commun.,<br>2016, 52, 9582-9585                                              |
| 0-1000<br>$\mu\text{M}$               | no                            | 8.3 $\mu\text{M}$                    | $\lambda_{\text{ex}} = 520 \text{ nm}$<br>$\lambda_{\text{em}} = 620 \text{ nm}$                               | 6 min         | Dyes Pigm., 2017,<br>138, 23-29                                                    |
| 0-1000<br>$\mu\text{M}$               | no                            | 0.104 $\mu\text{M}$                  | $\lambda_{\text{ex}} = 482 \text{ nm}$<br>$\lambda_{\text{em}} = 548 \text{ nm}$                               | 90 min        | Talanta 2018, 189,<br>274-280                                                      |
| 0–200 $\mu\text{M}$                   | lysosome-<br>targeted         | 5.02 $\mu\text{M}$                   | $\lambda_{\text{ex}} = 440 \text{ nm}$<br>$\lambda_{\text{em}} = 543 \text{ nm}$                               | 30 min        | Anal. Chem. 2016,<br>88, 9359-9363                                                 |
| 10-250<br>$\mu\text{M}$               | lysosome-<br>targeted         | 3 $\mu\text{M}$                      | $\lambda_{\text{ex}} = 405 \text{ nm}$<br>$\lambda_{\text{em}} = 506 \text{ nm}$                               | 40 min        | Chem. Commun.,<br>2017, 53, 6520-6523                                              |
| 0-200 $\mu\text{M}$                   | lysosome-<br>targeted         | 0.27 $\mu\text{M}$                   | $\lambda_{\text{ex}} = 482 \text{ nm}$<br>$\lambda_{\text{em}} = 548 \text{ nm}$                               | 60 min        | Spectrochim. Acta A<br>Mol. Biomol.<br>Spectrosc., 2021,<br>245,118949-<br>118955. |
| <b>0-500 <math>\mu\text{M}</math></b> | <b>lysosome<br/>-targeted</b> | <b>1.77 <math>\mu\text{M}</math></b> | <b><math>\lambda_{\text{ex}} = 435 \text{ nm}</math><br/><math>\lambda_{\text{em}} = 528 \text{ nm}</math></b> | <b>30 min</b> | <b>This work</b>                                                                   |

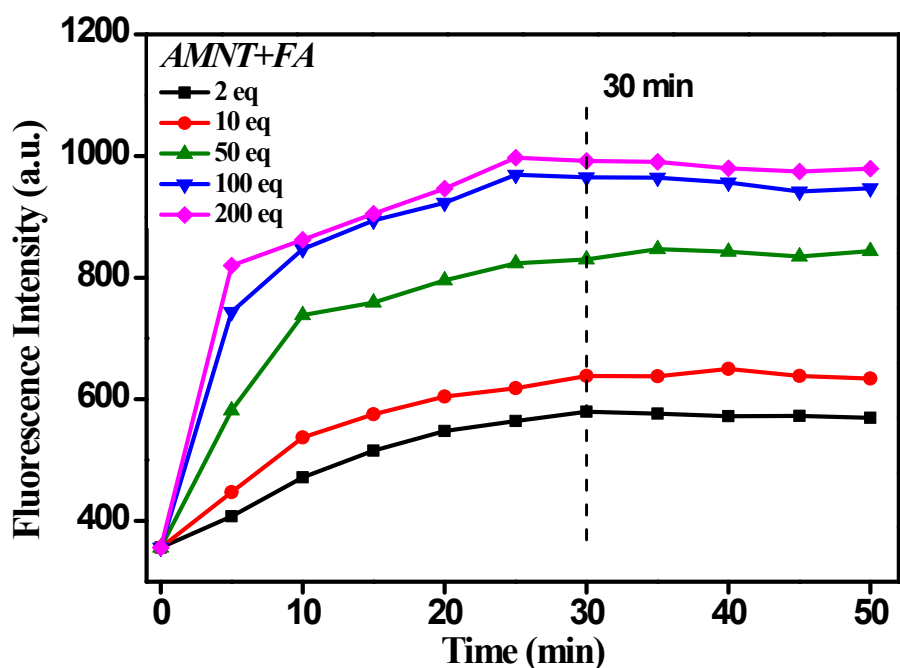

**Figure S1.** Time course fluorescence spectra of *AMNT* (10  $\mu\text{M}$ ) with different equiv of FA,  $\lambda_{\text{ex}} = 435 \text{ nm}$ .

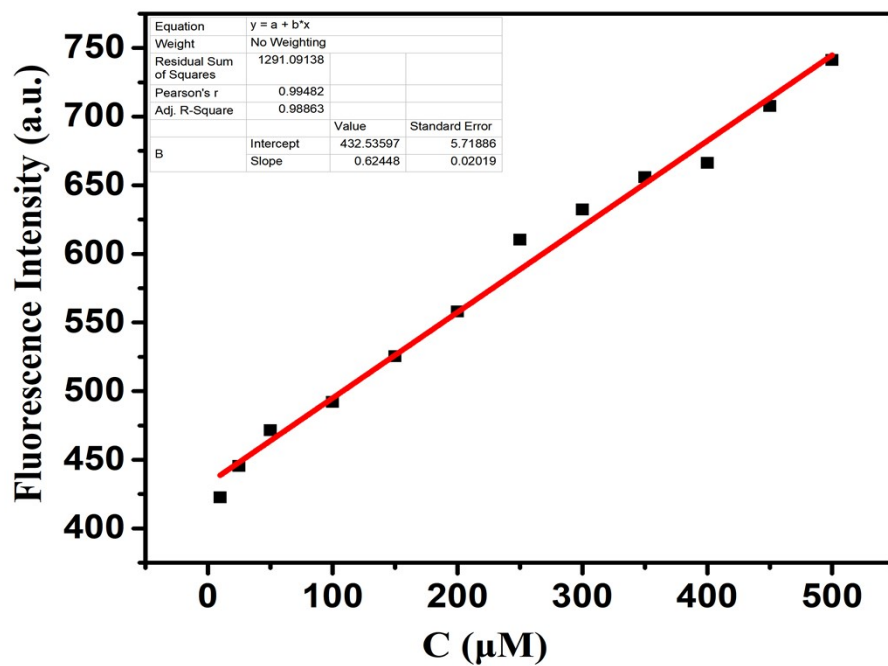

Figure S2. Linear calibration curve of fluorescence intensity of *AMNT* with FA (0-500  $\mu\text{M}$ ),  $\lambda_{\text{ex}} = 435 \text{ nm}$ .

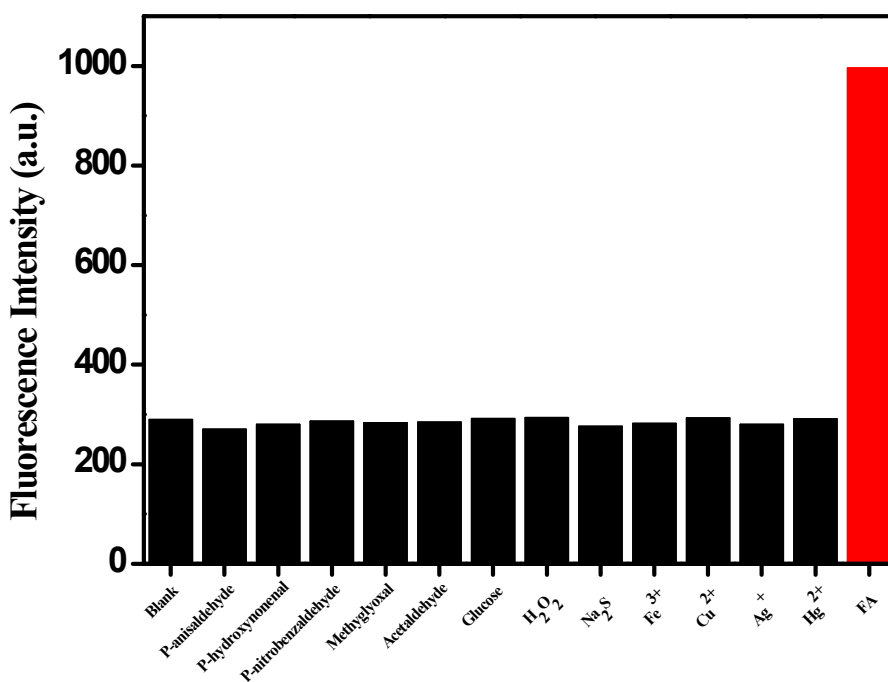

Figure S3. Specific selectivity of *AMNT* (10  $\mu\text{M}$ ) reacted with 1 mM different kinds of species. All spectra were obtained after 0.5 h of incubation with different analytes,

$\lambda_{\text{ex}} = 435 \text{ nm}$ . Each bar represent as: 0) Probe *AMNT*, 1) P-anisaldehyde, 2) P-hydroxynonenal, 3) P-nitrobenzaldehyde, 4) Methyglyoxal, 5) Acetaldehyde, 6) Glucose, 7)  $\text{H}_2\text{O}_2$ , 8)  $\text{Na}_2\text{S}$ , 9)  $\text{Fe}^{3+}$ , 10)  $\text{Cu}^{2+}$ , 11)  $\text{Ag}^+$ , 12)  $\text{Hg}^{2+}$ , 13) FA.

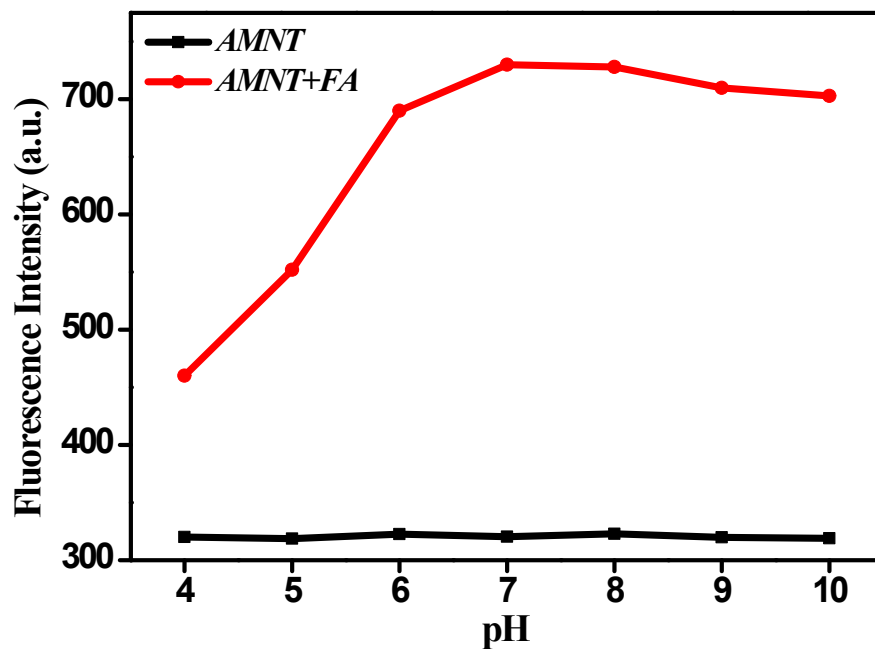

**Figure S4.** Fluorescence intensity of *AMNT* in the absence and presence of 500  $\mu\text{M}$  FA as a function of pH, Each data point was acquired 0.5 h after addition of FA in PBS buffer at 25  $^\circ\text{C}$ , *AMNT* = 10  $\mu\text{M}$ ,  $\lambda_{\text{ex}} = 435 \text{ nm}$ .



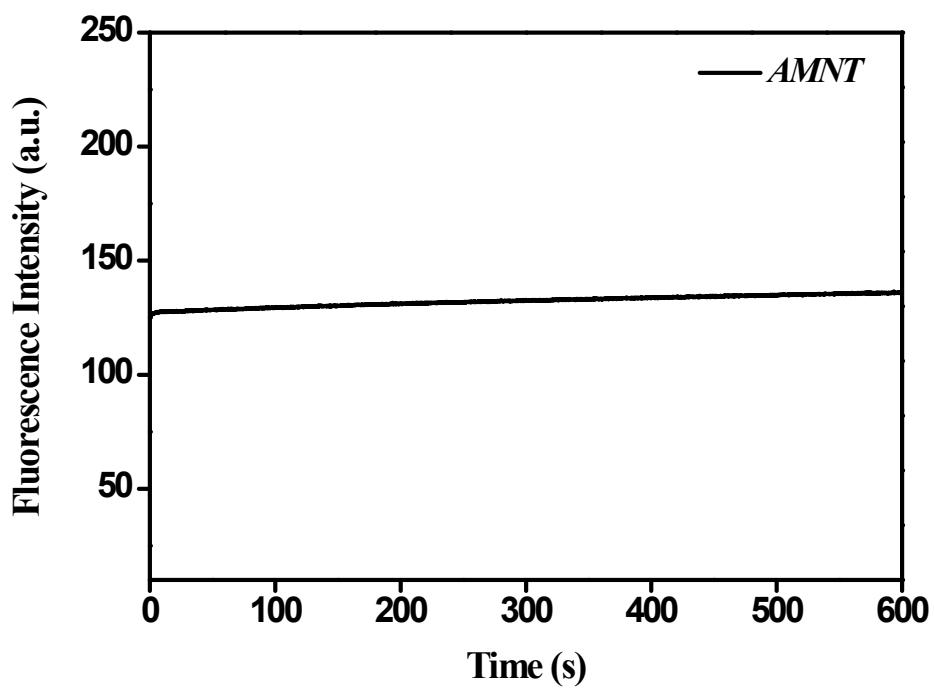

Figure S5. Hitachi F-7000 spectrofluorimeter was used to detection the light stable of *AMNT*.

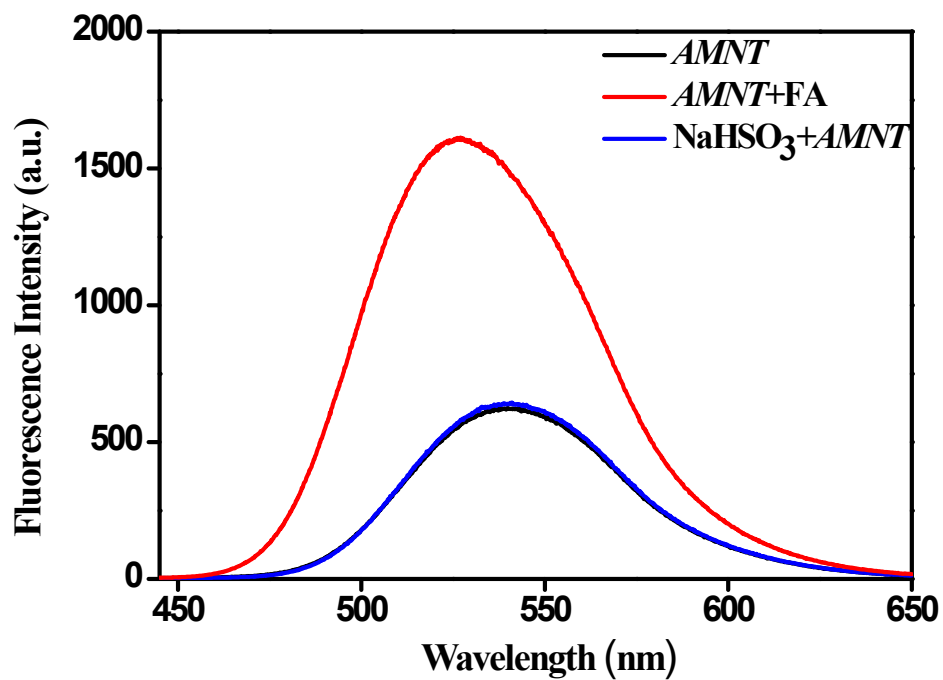

**Figure S6.** Fluorescence spectra of the free probe *AMNT* (10  $\mu$ M), *AMNT* (10  $\mu$ M) treated with FA (1 mM), and *AMNT* (10  $\mu$ M) treated with NaHSO<sub>3</sub> (200  $\mu$ M), Incubation time: 30 min,  $\lambda_{\text{ex}}$  = 435 nm.

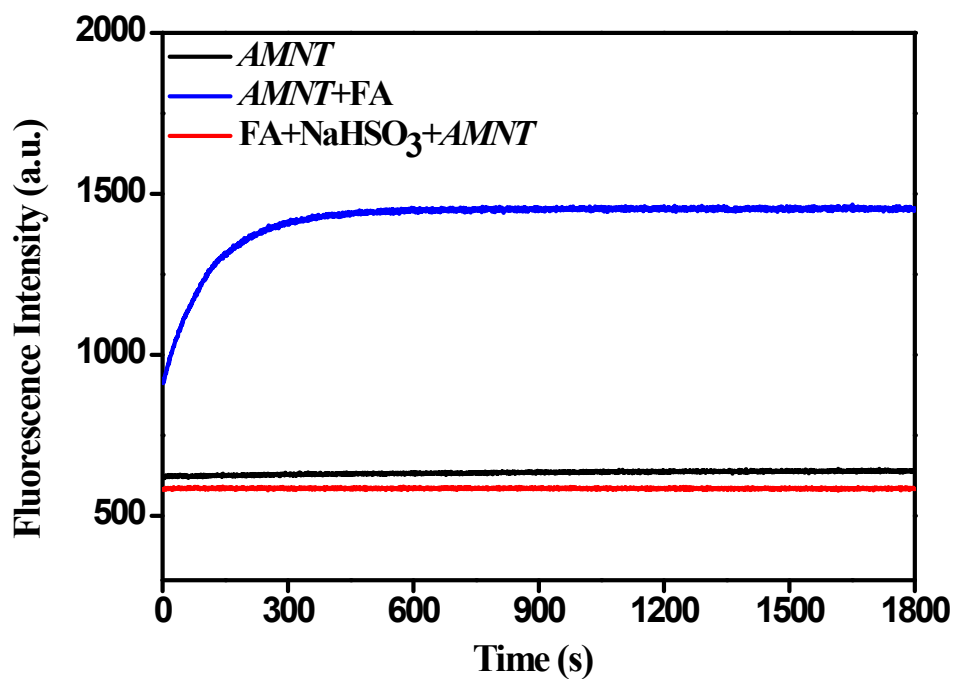

**Figure S7.** Reaction-time profiles, free probe, 1 mM FA pre-incubated with 10  $\mu$ M *AMNT*, and FA pre-incubated with 200  $\mu$ M NaHSO<sub>3</sub> then treated with the probe, respectively.

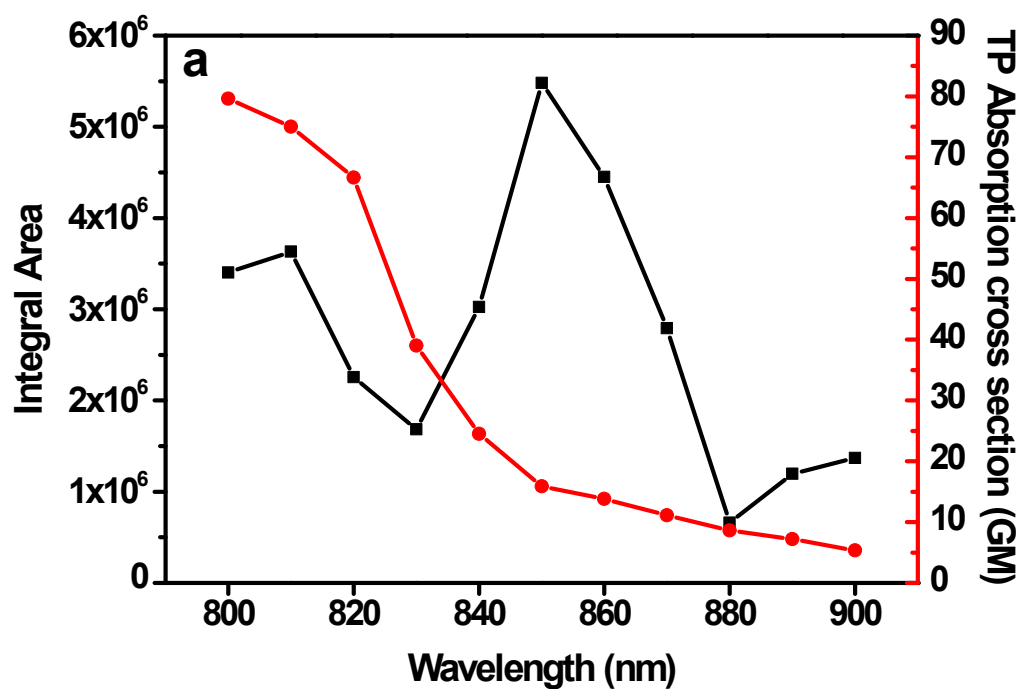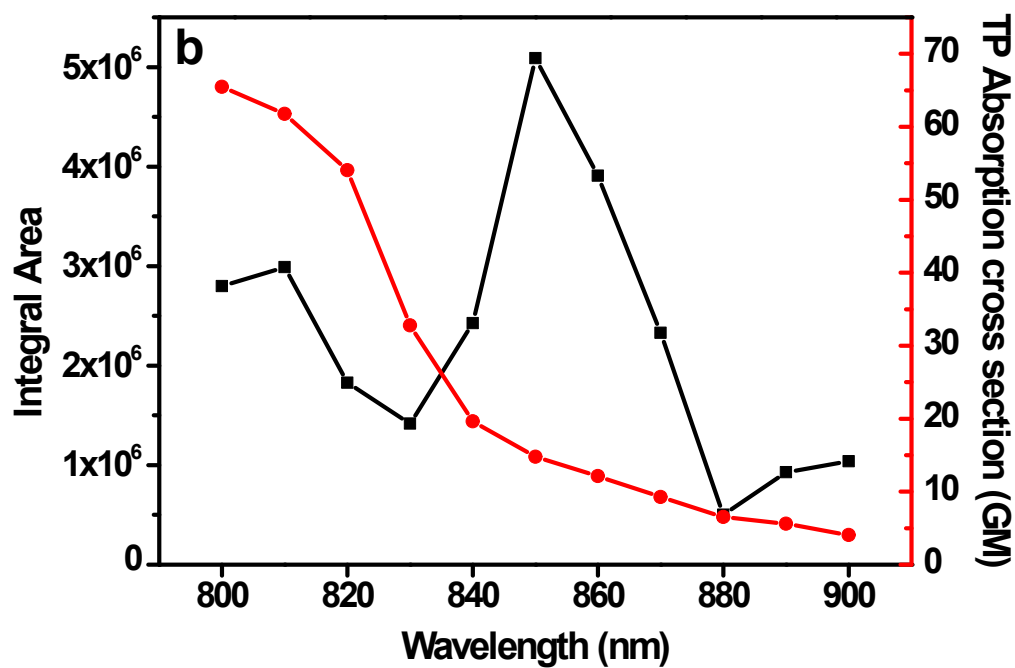

**Figure S8.** The fluorescence integral area (black line) and two-photon absorption cross-section (red line) spectrum of *AMNT* (a) and *AMNT-FA* (b).

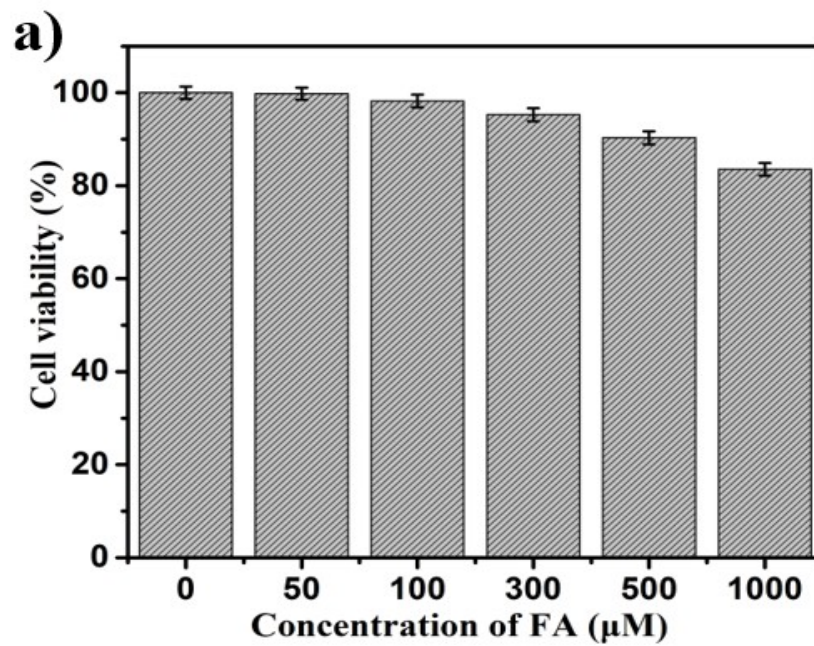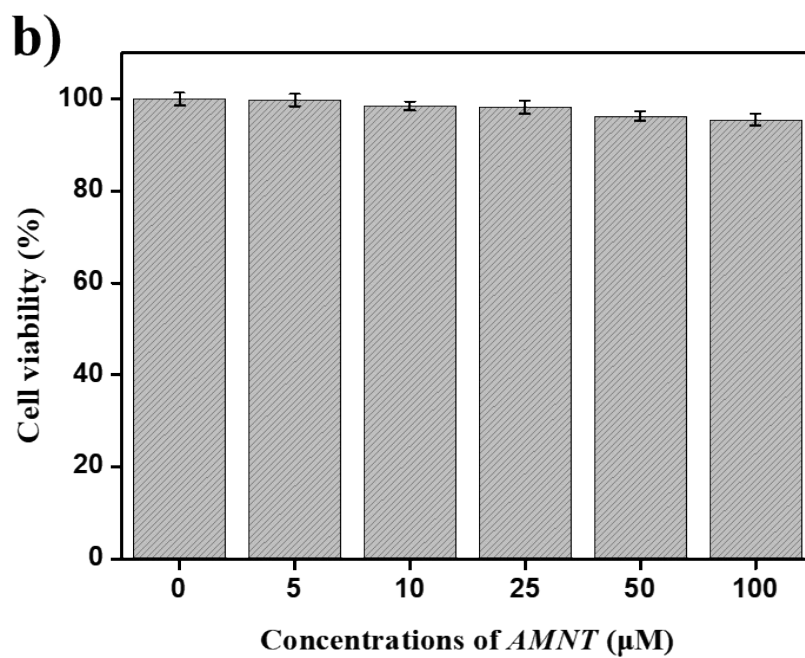

**Figure S9.** a) Effects of FA and b) Effects of *AMNT* at varied concentrations on the viability of HeLa cells. The cell viability data were checked three times.

0-435-540-ADD.FL

❖ Global Analysis (Reconvolution)

Fitting range : [249; 4096] channels

Global  $\chi^2$  : 1.073

$\chi^2$  : 1.058

|   | $B_i$  | $\Delta B_i$ | $f_i$ (%) | $\Delta f_i$ (%) | $\tau_i$ (ns) | $\Delta \tau_i$ (ns) |
|---|--------|--------------|-----------|------------------|---------------|----------------------|
| 1 | 0.0340 | 5.4e-5       | 95.44     | 0.1670           | 4.133 linked  | 0.0004               |
| 2 | 0.0006 | 5.3e-5       | 4.5591    | 0.3819           | 10.333 linked | 0.0025               |

Shift : -0.1714 ns ( $\pm 0$  ns)

Decay Background : 26.02 ( $\pm 0$ )

IRF Background : 5.9000

0-435-550-ADD.FL

❖ Global Analysis (Reconvolution)

Fitting range : [249; 4096] channels

Global  $\chi^2$  : 1.073

$\chi^2$  : 1.120

|   | $B_i$  | $\Delta B_i$ | $f_i$ (%) | $\Delta f_i$ (%) | $\tau_i$ (ns) | $\Delta \tau_i$ (ns) |
|---|--------|--------------|-----------|------------------|---------------|----------------------|
| 1 | 0.0336 | 5.3e-5       | 95.67     | 0.1708           | 4.133 linked  | 0.0004               |
| 2 | 0.0006 | 5.2e-5       | 4.3251    | 0.3894           | 10.333 linked | 0.0026               |

Shift : -0.1464 ns ( $\pm 0$  ns)

Decay Background : 25.74 ( $\pm 0$ )

IRF Background : 5.9000

0-435-530-ADD.FL

❖ Global Analysis (Reconvolution)

Fitting range : [249; 4096] channels

Global  $\chi^2$  : 1.073

$\chi^2$  : 1.041

|   | $B_i$  | $\Delta B_i$ | $f_i$ (%) | $\Delta f_i$ (%) | $\tau_i$ (ns) | $\Delta \tau_i$ (ns) |
|---|--------|--------------|-----------|------------------|---------------|----------------------|
| 1 | 0.0338 | 5.3e-5       | 95.48     | 0.1622           | 4.133 linked  | 0.0004               |
| 2 | 0.0006 | 5.2e-5       | 4.5165    | 0.3723           | 10.333 linked | 0.0025               |

Shift : -0.1772 ns ( $\pm 0$  ns)

Decay Background : 26.36 ( $\pm 0$ )

IRF Background : 5.9000

10-435-530-ADD.FL

❖ Global Analysis (Reconvolution)

Fitting range : [250; 4096] channels  
 Global  $\chi^2$  : 1.030  
 $\chi^2$  : 1.016

|   | $B_i$  | $\Delta B_i$ | $f_i(\%)$ | $\Delta f_i(\%)$ | $\tau_i$ (ns) | $\Delta \tau_i$ (ns) |
|---|--------|--------------|-----------|------------------|---------------|----------------------|
| 1 | 0.0221 | 0.0002       | 54.18     | 0.5665           | 4.631 linked  | 0.0010               |
| 2 | 0.0112 | 0.0002       | 45.82     | 0.9601           | 7.704 linked  | 0.0005               |

Shift : -0.1505 ns ( $\pm 0$  ns)  
 Decay Background : 33.53 ( $\pm 0$ )  
 IRF Background : 5.9000

10-435-540-ADD.FL

❖ Global Analysis (Reconvolution)

Fitting range : [250; 4096] channels  
 Global  $\chi^2$  : 1.030  
 $\chi^2$  : 1.003

|   | $B_i$  | $\Delta B_i$ | $f_i(\%)$ | $\Delta f_i(\%)$ | $\tau_i$ (ns) | $\Delta \tau_i$ (ns) |
|---|--------|--------------|-----------|------------------|---------------|----------------------|
| 1 | 0.0229 | 0.0002       | 56.61     | 0.5555           | 4.631 linked  | 0.0010               |
| 2 | 0.0105 | 0.0002       | 43.39     | 0.9480           | 7.704 linked  | 0.0005               |

Shift : -0.1453 ns ( $\pm 0$  ns)  
 Decay Background : 33.21 ( $\pm 0$ )  
 IRF Background : 5.9000

10-435-520-ADD.FL

❖ Global Analysis (Reconvolution)

Fitting range : [250; 4096] channels  
 Global  $\chi^2$  : 1.030  
 $\chi^2$  : 1.071

|   | $B_i$  | $\Delta B_i$ | $f_i(\%)$ | $\Delta f_i(\%)$ | $\tau_i$ (ns) | $\Delta \tau_i$ (ns) |
|---|--------|--------------|-----------|------------------|---------------|----------------------|
| 1 | 0.0495 | 0.0004       | 58.35     | 0.5302           | 4.631 linked  | 0.0010               |
| 2 | 0.0212 | 0.0005       | 41.65     | 0.9453           | 7.704 linked  | 0.0005               |

Shift : -4.3200 ns ( $\pm 0$  ns)  
 Decay Background : 32.40 ( $\pm 0$ )  
 IRF Background : 5.9000

Numerical Results

50-435-530-ADD.FL

❖ Global Analysis (Reconvolution)

Fitting range : [240; 4096] channels

Global  $\chi^2$  : 1.037

$\chi^2$  : 1.040

|   | $B_i$  | $\Delta B_i$ | $f_i(\%)$ | $\Delta f_i(\%)$ | $\tau_i(\text{ns})$ | $\Delta \tau_i(\text{ns})$ |
|---|--------|--------------|-----------|------------------|---------------------|----------------------------|
| 1 | 0.0172 | 0.0004       | 40.18     | 0.9663           | 4.656 linked        | 0.0018                     |
| 2 | 0.0158 | 0.0004       | 59.82     | 1.5803           | 7.542 linked        | 0.0007                     |

Shift : -0.0916 ns ( $\pm 0$  ns)

Decay Background : 35.71 ( $\pm 0$ )

IRF Background : 5.9000

50-435-540-ADD.FL

❖ Global Analysis (Reconvolution)

Fitting range : [240; 4096] channels

Global  $\chi^2$  : 1.037

$\chi^2$  : 1.036

|   | $B_i$  | $\Delta B_i$ | $f_i(\%)$ | $\Delta f_i(\%)$ | $\tau_i(\text{ns})$ | $\Delta \tau_i(\text{ns})$ |
|---|--------|--------------|-----------|------------------|---------------------|----------------------------|
| 1 | 0.0182 | 0.0004       | 43.11     | 0.9422           | 4.656 linked        | 0.0018                     |
| 2 | 0.0148 | 0.0004       | 56.89     | 1.5628           | 7.542 linked        | 0.0007                     |

Shift : -0.1293 ns ( $\pm 0$  ns)

Decay Background : 34.76 ( $\pm 0$ )

IRF Background : 5.9000

50-435-520-ADD.FL

❖ Global Analysis (Reconvolution)

Fitting range : [240; 4096] channels

Global  $\chi^2$  : 1.037

$\chi^2$  : 1.033

|   | $B_i$  | $\Delta B_i$ | $f_i(\%)$ | $\Delta f_i(\%)$ | $\tau_i(\text{ns})$ | $\Delta \tau_i(\text{ns})$ |
|---|--------|--------------|-----------|------------------|---------------------|----------------------------|
| 1 | 0.0162 | 0.0004       | 37.11     | 0.9765           | 4.656 linked        | 0.0018                     |
| 2 | 0.0169 | 0.0004       | 62.89     | 1.5768           | 7.542 linked        | 0.0007                     |

Shift : -0.1026 ns ( $\pm 0$  ns)

Decay Background : 36.34 ( $\pm 0$ )

IRF Background : 5.9000

Numerical Results

100-435-530-ADD.FL

❖ Global Analysis (Reconvolution)

Fitting range : [225; 4096] channels

Global  $\chi^2$  : 1.038

$\chi^2$  : 1.042

|   | $B_i$  | $\Delta B_i$ | $f_i(\%)$ | $\Delta f_i(\%)$ | $\tau_i(\text{ns})$ | $\Delta \tau_i(\text{ns})$ |
|---|--------|--------------|-----------|------------------|---------------------|----------------------------|
| 1 | 0.0141 | 0.0005       | 32.70     | 1.2718           | 4.734 linked        | 0.0026                     |
| 2 | 0.0184 | 0.0005       | 67.30     | 2.0285           | 7.477 linked        | 0.0007                     |

Shift : -0.0661 ns ( $\pm 0$  ns)

Decay Background : 36.68 ( $\pm 0$ )

IRF Background : 5.9000

100-435-540-ADD.FL

❖ Global Analysis (Reconvolution)

Fitting range : [225; 4096] channels

Global  $\chi^2$  : 1.038

$\chi^2$  : 1.018

|   | $B_i$  | $\Delta B_i$ | $f_i(\%)$ | $\Delta f_i(\%)$ | $\tau_i(\text{ns})$ | $\Delta \tau_i(\text{ns})$ |
|---|--------|--------------|-----------|------------------|---------------------|----------------------------|
| 1 | 0.0146 | 0.0005       | 34.20     | 1.2454           | 4.734 linked        | 0.0026                     |
| 2 | 0.0178 | 0.0005       | 65.80     | 1.9954           | 7.477 linked        | 0.0007                     |

Shift : -0.0671 ns ( $\pm 0$  ns)

Decay Background : 35.81 ( $\pm 0$ )

IRF Background : 5.9000

100-435-520-ADD.FL

❖ Global Analysis (Reconvolution)

Fitting range : [225; 4096] channels

Global  $\chi^2$  : 1.038

$\chi^2$  : 1.054

|   | $B_i$  | $\Delta B_i$ | $f_i(\%)$ | $\Delta f_i(\%)$ | $\tau_i(\text{ns})$ | $\Delta \tau_i(\text{ns})$ |
|---|--------|--------------|-----------|------------------|---------------------|----------------------------|
| 1 | 0.0130 | 0.0005       | 29.65     | 1.2893           | 4.734 linked        | 0.0026                     |
| 2 | 0.0196 | 0.0005       | 70.35     | 2.0343           | 7.477 linked        | 0.0007                     |

Shift : -0.0547 ns ( $\pm 0$  ns)

Decay Background : 36.92 ( $\pm 0$ )

IRF Background : 5.9000

Figure S10. Global analyses of decay times  $\tau_1$ ,  $\tau_2$ , and the relative amplitude (%).



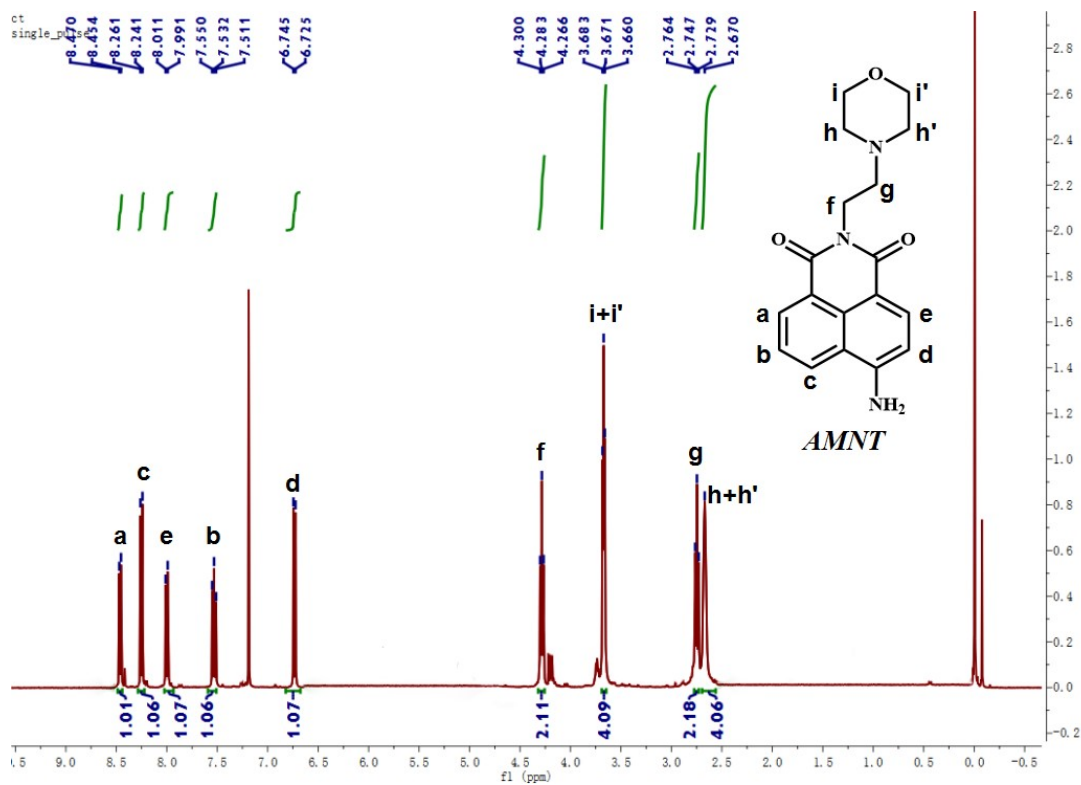

**Figure S11.**  $^1\text{H}$  NMR ( $\text{CDCl}_3$ , 400 MHz) spectrum of *AMNT*.

*AMNT*:  $\delta$  8.46 (d, 1H,  $J = 8.0$  Hz, H-a), 8.25 (d, 1H,  $J = 8.0$  Hz, H-c), 8.00 (d, 1H,  $J = 8.0$  Hz, H-e), 7.53 (t, 1H,  $J = 8.0$  Hz, H-b), 7.33 (d, 1H,  $J = 8.0$  Hz, H-d), 4.28 (t, 2H,  $J = 8.0$  Hz, H-f), 3.67 (t, 4H,  $J = 4.0$  Hz, H-i+i'), 2.74 (t, 2H,  $J = 8.0$  Hz, H-g), 2.67 (m, 4H, H-h+h').

### Generic Display Report

**Analysis Info**

Analysis Name D:\Data\yangy\new\CAOTING171025\_18\_01\_13661.d  
Method POS\_100-1200\_For LC.m  
Sample Name CAOTING171025  
Comment

Acquisition Date 10/25/2017 1:21:05 PM

Operator LZU  
Instrument micrOTOF

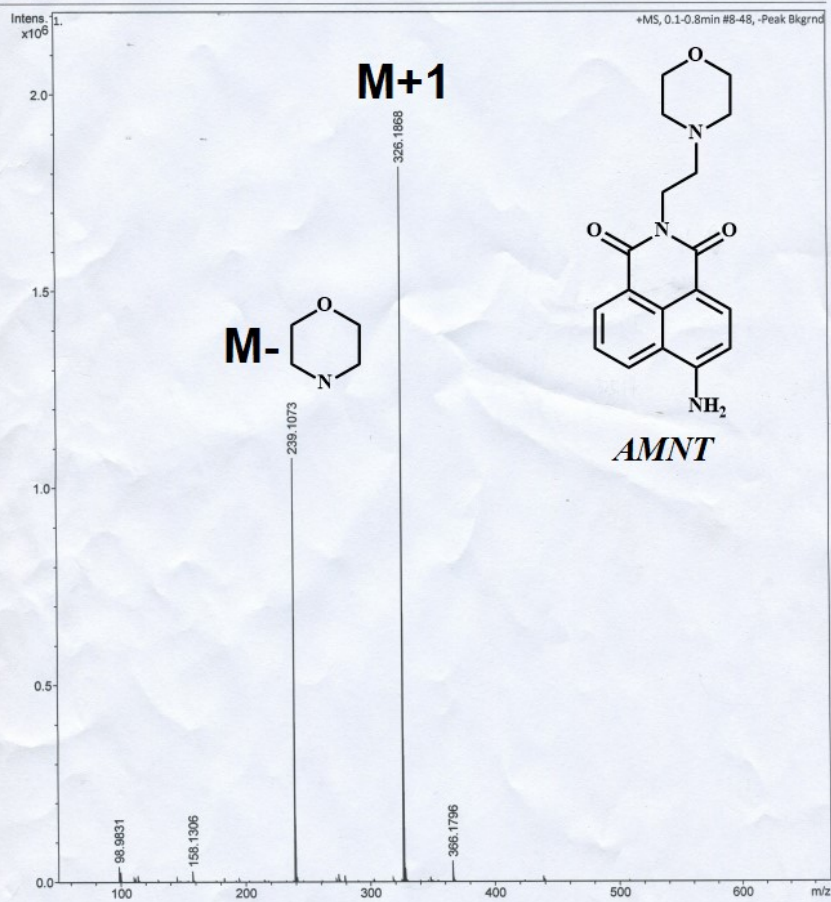

Bruker Compass DataAnalysis 4.1

printed: 10/25/2017 3:41:02 PM

by: LZU

Page 1 of 1

**Figure S12.** MS Spectrum of *AMNT* ( $C_{18}H_{19}N_3O_3$ ): calcd for *AMNT* ( $C_{18}H_{19}N_3O_3$ ) 325.14, found 326.19 (M+1).

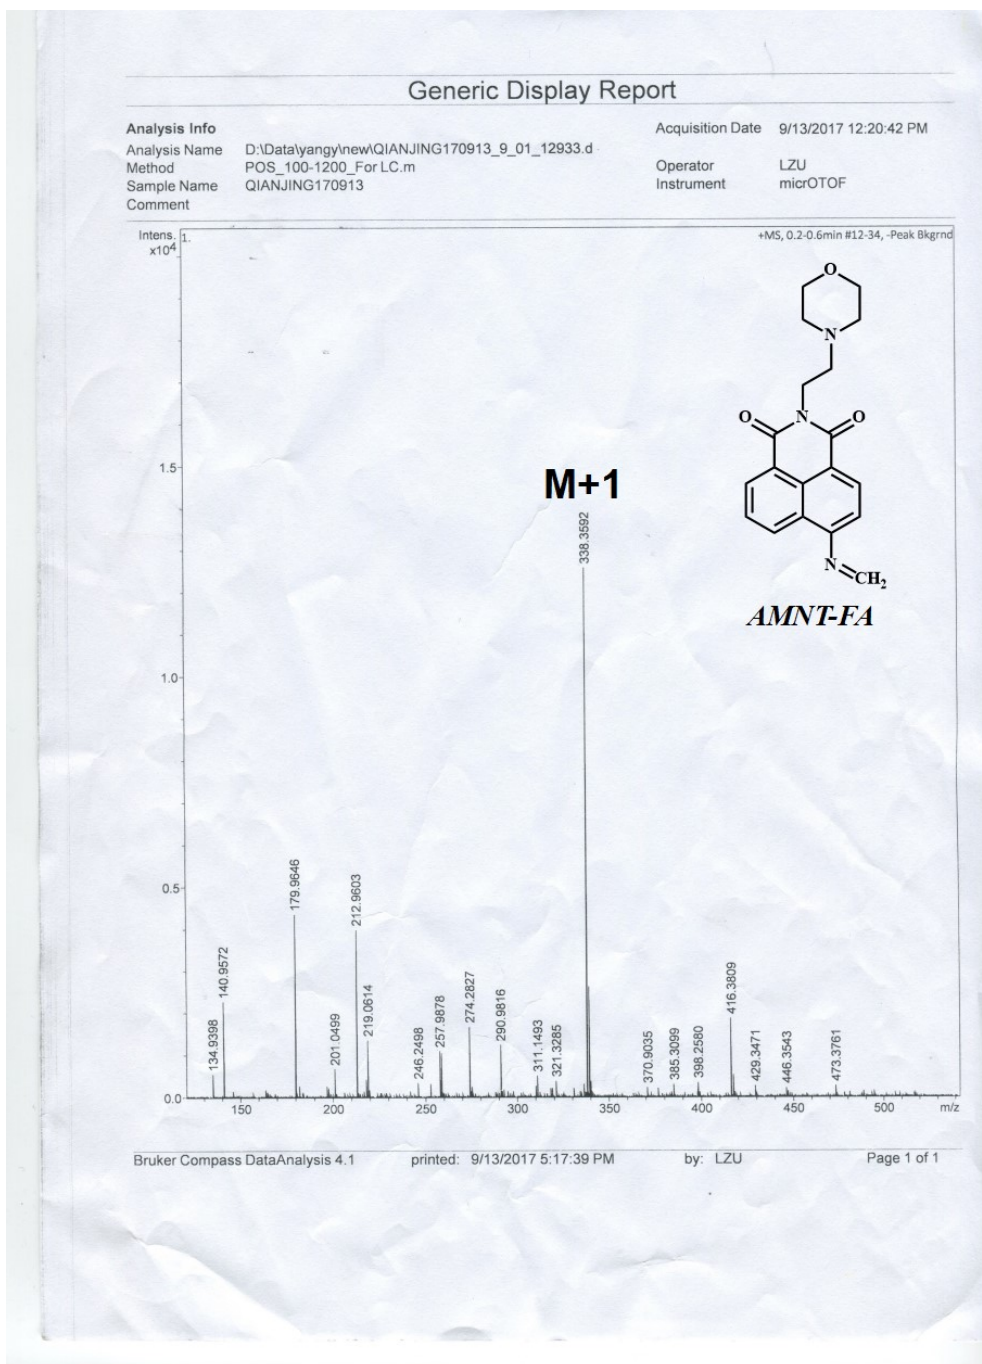

**Figure S13.** MS Spectrum of *AMNT+FA* ( $C_{19}H_{19}N_3O_3$ ), the exact molecular weight of *AMNT+FA* is 337.14, found is 338.36 (M+1).

### References

- [1] Lynn Würrth, Inga J. Wolf, Wolfgang Marquardt, On the Numerical Solution of Discounted Economic NMPC on Infinite Horizons, The International Federation of Automatic Control, **2013**, 18-20.
